# Supplementary material
Source: PubMed Central journal article supplement (PMC1422166)

### Supplemental data

**Figure S1. Subcellular distribution of MDMX at early time points after irradiation.** HCT116 cells were treated with 10 Gy gamma irradiation in the presence or absence of 30  $\mu$ M MG132. Cells harvested at indicated time points were analyzed by nuclear /cytoplasmic fractionation. Samples representing identical cell number were analyzed by western blot. In the absence of MG132, MDMX level in both compartment decreased after irradiation. In the presence of MG132, cytoplasmic MDMX decreased whereas nuclear MDMX remained the same or increased after irradiation, consistent with nuclear import and degradation.

Figure S1. LeBron et al

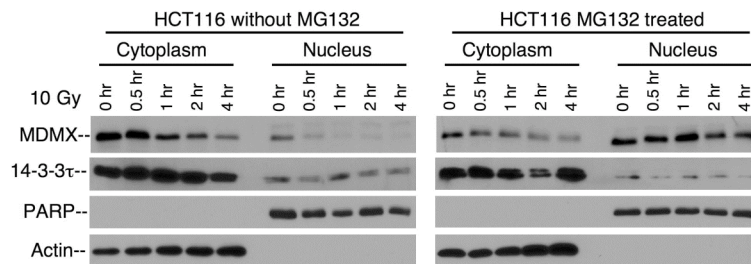

Supplement: 7601032s1.pdf [file 7601032s1.pdf]
